# Supplementary material for: The imbalance of liver resident macrophages polarization promotes chronic autoimmune hepatitis development in mice
Source: PeerJ. 2023 Feb 7;11:e14871. doi: 10.7717/peerj.14871 (PMC9912947; doi:10.7717/peerj.14871)
Supplement: Supplemental Information 1 [file peerj-11-14871-s001.xlsx]

## Sheet: Figure 1
	inflammation scores
	Figure1B
		Replicate 1	Replicate 2	Replicate 3	average	SD
	Naive	0	0	0	0	0
	Ad/pCYP2D6	1.3	2	1.2	1.5	0.4359
	Ad/pCYP2D6/clodronate	2.8	2.1	3.2	2.7	0.5568
	Figure 1C
	Il1b
		Replicate 1	Replicate 2	Replicate 3	average	SD
	Naive	0.00835	0.00872	0.00842	0.00849667	0.0001966
	Ad/pCYP2D6	0.0153	0.0132	0.0172	0.0152333	0.002001
	Ad/pCYP2D6/clodronate	0.025	0.021	0.03	0.026	0.004509
	Tnfa	Replicate 1	Replicate 2	Replicate 3	average	SD
	Naive	0.000218	0.000202	0.00025	0.000223333	2.4e-05
	Ad/pCYP2D6	0.000343	0.000363	0.000389	0.000365	2.3e-05
	Ad/pCYP2D6/clodronate	0.000625	0.000662	0.000623	0.000636667	2.3e-05
	Figure1E
		Replicate 1	Replicate 2	Replicate 3	average	SD
	Naive	0	0	0	0	0
	Ad/pCYP2D6	1.2	2.2	1.3	1.56667	0.5508
	Ad/pCYP2D6/clodronate	3.8	2.8	3.2	3.26667	0.5033
	Figure1F Col1a1
	d50	Replicate 1	Replicate 2	Replicate 3	average	SD
	Naive	0.00062	0.00043	0.00042	0.00049	0.0001127
	Ad/pCYP2D6	0.00178	0.00228	0.0017	0.00192	0.0003143
	Ad/pCYP2D6/clodronate	0.0031	0.00396	0.0034	0.00348667	0.0004365
	Figure1F Col1a2
	d50	Replicate 1	Replicate 2	Replicate 3	average	SD
	Naive	0.00053	0.00046	0.000676	0.000555333	0.0001102
	Ad/pCYP2D6	0.0022	0.0016	0.0014	0.00173333	0.0004163
	Ad/pCYP2D6/clodronate	0.0028	0.0038	0.0034	0.00333333	0.0005033

## Sheet: Figure 2
	Figure 2A
	IL-6
		Replicate 1	Replicate 2	Replicate 3	average	SD
	Naive	0.000572	0.000576	0.00042	0.000522667	8.89e-05
	Ad/pCYP2D6	0.001452	0.00108	0.00102	0.001184	0.0002329
	Ad/pCYP2D6/clodronate	0.0016	0.0015	0.0021	0.00173333	0.0003215
	IL-12
		Replicate 1	Replicate 2	Replicate 3	average	SD
	Naive	0.000572	0.000712	0.000583	0.000622333	7.8e-05
	Ad/pCYP2D6	0.00194	0.00155	0.00152	0.00167	0.0002343
	Ad/pCYP2D6/clodronate	0.0023	0.0021	0.00273	0.00237667	0.0003219
	IFN-r
		Replicate 1	Replicate 2	Replicate 3	average	SD
	Naive	0.000416	0.000434	0.000414	0.000421333	0.00011
	Ad/pCYP2D6	0.000682	0.000844	0.000657	0.000727667	0.0001
	Ad/pCYP2D6/clodronate	0.001311	0.00148	0.001275	0.00135533	0.00011
	Figure 2B
	IL-4
		Replicate 1	Replicate 2	Replicate 3	average	SD
	Naive	1.56e-05	2.68e-05	1.42e-05	1.9e-05	7e-06
	Ad/pCYP2D6	5.86e-05	7.67e-05	5.93e-05	6.4e-05	1e-05
	Ad/pCYP2D6/clodronate	9.9e-05	9.9e-05	9.9e-05	9.9e-05	1.8e-05
	IL-13
		Replicate 1	Replicate 2	Replicate 3	average	SD
	Naive	1.1e-05	2.36e-05	1.3e-05	1.6e-05	6.7e-06
	Ad/pCYP2D6	5.33e-05	6.38e-05	4.5e-05	5.4e-05	1e-05
	Ad/pCYP2D6/clodronate	8.96e-05	7.02e-05	7.6e-05	7.9e-05	1e-05

## Sheet: Figure 3
	Figure 3B
	iNOS				d30					d40
		Replicate 1	Replicate 2	Replicate 3	average	SD	Replicate 1	Replicate 2	Replicate 3	average	SD
	Naive	1.02e-05	6.3e-06	7.3e-06	8e-06	2e-06
	Ad/pCYP2D6	2.3e-05	1.5e-05	1.6e-05	1.8e-05	4e-06	4.02e-05	5.21e-05	4.03e-05	4.4e-05	7e-06
	Arg-1				d30					d40
		Replicate 1	Replicate 2	Replicate 3	average	SD	Replicate 1	Replicate 2	Replicate 3	average	SD
	Naive	1.663	1.61	1.62	1.63	0.28
	Ad/pCYP2D6	1.352	1.32	1.35	1.341	0.018	0.6	0.58	0.65	0.61	0.38
	TNF-a				d30					d40
		Replicate 1	Replicate 2	Replicate 3	average	SD	Replicate 1	Replicate 2	Replicate 3	average	SD
	Naive	3.12e-05	3.74e-05	2.68e-05	3.2e-05	5.3e-06
	Ad/pCYP2D6	5.84e-05	4.9e-05	5e-05	5.2e-05	5.1e-06	0.000131	0.000116	9.2e-05	0.000113	1.9e-05
	Ym-1				d30					d40
		Replicate 1	Replicate 2	Replicate 3	average	SD	Replicate 1	Replicate 2	Replicate 3	average	SD
	Naive	0.00316	0.00372	0.00293	0.00327	0.000406
	Ad/pCYP2D6	0.00238	0.00231	0.00297	0.002553	0.000363	0.00104	0.00102	0.00144	0.001166	0.00024
	Figure 3C
	iNOS							TNF-a
		Replicate 1	Replicate 2	Replicate 3	average	SD			Replicate 1	Replicate 2	Replicate 3	average	SD
	Naive	6.8e-06	8e-06	8.7e-06	8e-06	1e-06		Naive	3.4e-05	3.8e-05	2.48e-05	3.2e-05	7e-06
	control	2.21e-05	1.66e-05	1.62e-05	1.8e-05	3e-06		control	7.6e-05	6.2e-05	6.6e-05	6.8e-05	7e-06
	p3.1	1.67e-05	2.06e-05	1.68e-05	1.8e-05	2e-06		p3.1	7.2e-05	5.8e-05	6.8e-05	6.6e-05	7e-06
	psTLR2	1.65e-05	1.68e-05	2.16e-05	1.8e-05	3e-06		psTLR2	6.1e-05	7.44e-05	6.26e-05	6.6e-05	7e-06
	psTLR4	1.03e-05	1.04e-05	1.41e-05	1e-05	2e-06		psTLR4	4.16e-05	3.5e-05	3.1e-05	3.6e-05	5e-06
	Arg-1							Ym-1
		Replicate 1	Replicate 2	Replicate 3	average	SD			Replicate 1	Replicate 2	Replicate 3	average	SD
	Naive	1.53	1.78	1.58	1.63	0.13		Naive	0.00376	0.0031	0.0028	0.00322	0.000491
	control	1.46	1.33	1.24	1.34	0.11		control	0.00223	0.00246	0.00325	0.00265	0.000535
	p3.1	1.26	1.51	1.38	1.38	0.12		p3.1	0.00297	0.00233	0.00235	0.00255	0.000365
	psTLR2	0.58	0.83	0.54	0.65	0.16		psTLR2	0.00108	0.00182	0.00111	0.00134	0.00042
	psTLR4	1.25	1.58	1.27	1.36	0.19		psTLR4	0.00212	0.00298	0.00245	0.00252	0.00043

## Sheet: Figure 4
	Figure 4A
	iNOS								TNF-a
		Replicate 1	Replicate 2	Replicate 3	average	SD				Replicate 1	Replicate 2	Replicate 3	average	SD
	Naive	1.1e-05	1.36e-05	9.8e-05	1.1e-05	2e-06			Naive	3.25e-05	3.86e-05	2.5e-05	3.2e-05	7e-06
	control	3.31e-05	2.37e-05	2.58e-05	2.8e-05	5e-06			control	7.68e-05	5.57e-05	5.42e-05	6.2e-05	1.3e-05
	Pam3	2.33e-05	3.36e-05	2.4e-05	2.7e-05	6e-06			Pam3	5.21e-05	7.24e-05	5.76e-05	6.1e-05	1.1e-05
	LPS	4.41e-05	4.26e-05	5.52e-05	4.7e-05	7e-06			LPS	8.4e-05	9.1e-05	0.000118	9.8e-05	1.8e-05
	Arg-1								Ym-1
		Replicate 1	Replicate 2	Replicate 3	average	SD				Replicate 1	Replicate 2	Replicate 3	average	SD
	Naive	0.02	0.0182	0.0256	0.0212	0.0038			Naive	0.00618	0.00785	0.00642	0.00682	0.0011
	control	0.0124	0.0186	0.0132	0.0147	0.0034			control	0.00503	0.00381	0.00385	0.00423	0.000693
	Pam3	0.0296	0.0301	0.0383	0.0327	0.0049			Pam3	0.0157	0.0102	0.0093	0.0107	0.00145
	LPS	0.014	0.0186	0.0128	0.0151	0.0031			LPS	0.00366	0.0052	0.00351	0.00412	0.000936
	Figure 4B
	IL-1β								IL-6
		Replicate 1	Replicate 2	Replicate 3	average	SD				Replicate 1	Replicate 2	Replicate 3	average	SD
	Naive	0.00763	0.00759	0.0106	0.0086	0.00173			Naive	0.000498	0.00063	0.00045	0.000526	9.3e-05
	control	0.0135	0.0187	0.0133	0.0152	0.00306			control	0.00101	0.00148	0.00112	0.0012	0.00025
	Pam3	0.0148	0.0141	0.0193	0.0161	0.00282			Pam3	0.00136	0.00108	0.000952	0.0011	0.000209
	LPS	0.029	0.0265	0.021	0.026	0.0041			LPS	0.00158	0.00212	0.00161	0.0018	0.000303
	IL-10								TGF-β
		Replicate 1	Replicate 2	Replicate 3	average	SD				Replicate 1	Replicate 2	Replicate 3	average	SD
	Naive	0.0012	0.00152	0.00113	0.00129	0.00021			Naive	0.00192	0.00257	0.00172	0.00207	0.000444
	control	0.000806	0.000751	0.00106	0.00087	0.00016			control	0.00123	0.00114	0.00173	0.00137	0.000318
	Pam3	0.00261	0.00215	0.00211	0.0023	0.00028			Pam3	0.00386	0.00317	0.00276	0.00326	0.000556
	LPS	0.0007	0.00084	0.000962	0.00083	0.00013			LPS	0.00115	0.00124	0.00186	0.00142	0.000387
	Figure 4C
	TLR4								TLR2
		Replicate 1	Replicate 2	Replicate 3	average	SD				Replicate 1	Replicate 2	Replicate 3	average	SD
	d0	0.000181	0.000263	0.000191	0.000212	4.5e-05			d0	0.00122	0.000881	0.000861	0.000987	0.000202
	d20	0.000421	0.000355	0.000318	0.000365	5.2e-05			d20	0.00157	0.00123	0.00151	0.00143	0.000182
	d30	0.000386	0.000524	0.000405	0.000438	7.5e-05			d30	0.00133	0.00135	0.00109	0.00126	0.000145
	d40	0.000429	0.000442	0.000553	0.000475	6.8e-05			d40	0.000865	0.00122	0.000913	0.000999	0.000193
